# Supplementary material for: Three-component reactions of conjugated dienes, CH acids and formaldehyde under diffusion mixing conditions
Source: publisher site journal article supplement (doi:10.3762/bjoc.21.18), 2025-02-04
Supplement: Additional file 1 [file 1860-5397-21-18-S1.pdf]

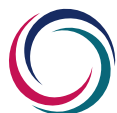

## Supporting Information

for

### Three-component reactions of conjugated dienes, CH acids and formaldehyde under diffusion mixing conditions

Dmitry E. Shybanov, Maxim E. Kukushkin, Eugene V. Babaev, Nikolai V. Zyk and Elena K. Beloglazkina

*Beilstein J. Org. Chem.* **2025**, *21*, 262–269. doi:10.3762/bjoc.21.18

### $^1\text{H}$ and $^{13}\text{C}$ NMR spectra of synthesized compounds

---

## Table of contents

|                                                                                                                     |     |
|---------------------------------------------------------------------------------------------------------------------|-----|
| 1. Synthesis .....                                                                                                  | S2  |
| 2. $^1\text{H}$ and $^{13}\text{C}$ NMR spectra of the compounds <b>3–10</b> and <b>12–16</b> .....                 | S6  |
| 3. $^1\text{H}$ NMR spectra of reaction mixtures formed during bromination of compounds <b>4</b> and <b>5</b> ..... | S18 |
| 4. LC–MS/MS spectra of compound mixtures .....                                                                      | S20 |
| References .....                                                                                                    | S23 |

## 1. Synthesis

*2,4-dibenzoyl-1,5-diphenylpentane-1,5-dione* (**3**) [1]. From 1,3-diphenylpropane-1,3-dione (112 mg, 0.50 mmol) and L-proline (3 mg, 0.025 mmol) compound **3** (227 mg, 99%) was obtained as a white crystalline solid.

**<sup>1</sup>H NMR** (400 MHz, CDCl<sub>3</sub>): δ 8.20-8.12 (m, 8H), 7.63-7.57 (m, 4H), 7.54-7.45 (m, 8H), 5.76 (t, *J* = 7.0 Hz, 2H), 2.77 (t, *J* = 7.0 Hz, 2H). **<sup>13</sup>C NMR** (101 MHz, CDCl<sub>3</sub>): δ 196.7 (4C), 135.6 (4C), 134.0 (4C), 129.2 (8C), 128.9 (8C), 54.1 (2C), 29.1.

**HRMS** (ESI+) *m/z* calcd. for (C<sub>31</sub>H<sub>25</sub>O<sub>4</sub>, M+H): 461.1747, found: (M+H): 461.1753.

*Ethyl (1S\*,2S\*,4S\*)-2-cyanobicyclo[2.2.1]hept-5-ene-2-carboxylate* (**4a**) and *ethyl (1S\*,2R\*,4S\*)-2-cyanobicyclo[2.2.1]hept-5-ene-2-carboxylate* (**4b**) [2]. From cyanoacetic acid ester (113 mg, 1.0 mmol), L-proline (6 mg, 0.05 mmol) and cyclopentadiene (330 mg, 5.0 mmol) the mixture of compounds **4a** and **4b** in 78/22 ratio (189 mg, 99%) was obtained as a light orange oil.

**Major isomer 4a:** **<sup>1</sup>H NMR** (400 MHz, CDCl<sub>3</sub>): δ 6.31 (dd, *J* = 5.5, 2.9 Hz, 1H), 5.86 (dd, *J* = 5.5, 2.9 Hz, 1H), 4.19 (qd, *J* = 7.2, 3.2 Hz, 2H), 3.56-3.51 (m, 1H), 3.10-3.06 (m, 1H), 2.23 (dd, *J* = 12.5, 3.7 Hz, 1H), 2.05 (dd, *J* = 12.5, 2.9 Hz, 1H), 1.79-1.73 (m, 1H), 1.67-1.59 (m, 1H), 1.29 (t, *J* = 7.2 Hz, 3H). **<sup>13</sup>C NMR** (101 MHz, CDCl<sub>3</sub>): δ 167.4, 140.3, 131.0, 121.7, 62.7, 53.6, 49.2 (2C), 42.9, 37.2, 14.1.

**Minor isomer 4b:** **<sup>1</sup>H NMR** (400 MHz, CDCl<sub>3</sub>): δ 6.43 (dd, *J* = 5.8, 3.0 Hz, 1H), 6.33-6.27 (m, 1H), 4.27 (q, *J* = 7.1 Hz, 2H), 3.38-3.35 (m, 1H), 3.10-3.06 (m, 1H), 2.54 (dd, *J* = 12.4, 3.4 Hz, 1H), 1.69 (dd, *J* = 12.4, 2.7 Hz, 1H), 1.67-1.59 (m, 1H), 1.54-1.49 (m, 1H), 1.33 (t, *J* = 7.1 Hz, 3H). **<sup>13</sup>C NMR** (101 MHz, CDCl<sub>3</sub>): δ 167.4, 141.0, 134.1, 121.1, 63.0, 52.4, 46.8, 46.5, 42.7, 39.1, 14.1.

**HRMS** (ESI+) *m/z* calcd. for (C<sub>11</sub>H<sub>14</sub>NO<sub>2</sub>, M+H): 192.1019, found: (M+H): 192.1020.

*Ethyl (1S\*,2S\*,4S\*)-2-acetylbicyclo[2.2.1]hept-5-ene-2-carboxylate* (**5a**), *ethyl (1S\*,2R\*,4S\*)-2-acetylbicyclo[2.2.1]hept-5-ene-2-carboxylate* (**5b**) and *ethyl (4aR\*,7aS\*)-2-methyl-4,4a,5,7a-tetrahydrocyclopenta[b]pyran-3-carboxylate* (**6**). From acetoacetic ester (130 mg, 1.0 mmol), L-proline (6 mg, 0.05 mmol) and cyclopentadiene (330 mg, 5.0 mmol) the mixture of compounds **5a**, **5b** and **6** in 27/67/6 ratio (196 mg, 94%) was obtained as a colorless oil.

**Minor isomer 5a:** **<sup>1</sup>H NMR** (400 MHz, CDCl<sub>3</sub>): δ 6.23 (dd, *J* = 5.6, 3.0 Hz, 1H), 5.96 (dd, *J* = 5.6, 2.9 Hz, 1H), 4.20-4.05 (m, 2H), 3.33 (s, 1H), 2.85 (s, 1H), 2.15 (s, 3H), 2.05-1.97 (m, 2H), 1.45-1.41 (m, 1H), 1.38-1.33 (m, 1H), 1.24-1.17 (m, 3H). **<sup>13</sup>C NMR** (101 MHz, CDCl<sub>3</sub>): δ 204.4, 171.7, 140.0, 133.9, 67.9, 61.3, 48.4, 48.3, 42.2, 34.4, 27.2, 14.1.

**Major isomer 5b:** **<sup>1</sup>H NMR** (400 MHz, CDCl<sub>3</sub>): δ 6.17 (dd, *J* = 5.6, 3.1 Hz, 1H), 5.88 (dd, *J* = 5.6, 2.8 Hz, 1H), 4.20-4.05 (m, 2H), 3.41 (s, 1H), 2.85 (s, 1H), 2.08 (s, 3H), 2.02-1.97 (m, 1H), 1.95-1.92 (m,

1H), 1.62-1.58 (m, 1H), 1.51-1.46 (m, 1H), 1.24-1.17 (m, 3H). <sup>13</sup>C NMR (101 MHz, CDCl<sub>3</sub>): δ 202.5, 172.9, 140.1, 132.3, 67.6, 61.6, 49.5, 49.1, 42.2, 33.9, 27.5, 14.1.

**Minor isomer 6:** <sup>1</sup>H NMR (400 MHz, CDCl<sub>3</sub>) (due to the low content of compound **6** in the mixture and the overlap of most signals with the signals of the main isomer, only characteristic peaks are indicated): δ 5.96-5.93 (m, 1H), 5.82-5.77 (m, 1H), 4.93 (d, *J* = 6.9 Hz, 1H).

**HRMS** (ESI+) *m/z* calcd. for (C<sub>12</sub>H<sub>17</sub>O<sub>3</sub>, M+H): 209.1172, found: (M+H): 209.1175.

*1,1'-(Bicyclo[2.2.1]hept-5-ene-2,2-diyl)bis(ethan-1-one)* (**7**). From acetylacetone (100 mg, 1.0 mmol), L-proline (6 mg, 0.05 mmol) and cyclopentadiene (330 mg, 5.0 mmol) compound **7** (63 mg, 38%) was obtained as a colorless oil.

<sup>1</sup>H NMR (400 MHz, CDCl<sub>3</sub>): δ 6.17 (dd, *J* = 5.7, 3.1 Hz, 1H), 5.92 (dd, *J* = 5.7, 2.9 Hz, 1H), 3.52-3.46 (m, 1H), 2.86-2.79 (m, 1H), 2.09-2.03 (m, 1H), 2.07 (s, 3H), 2.01 (s, 3H), 1.87 (dd, *J* = 12.2, 3.8 Hz, 1H), 1.48-1.42 (m, 1H), 1.27 (d, *J* = 8.8 Hz, 1H). <sup>13</sup>C NMR (101 MHz, CDCl<sub>3</sub>): δ 206.0, 204.5, 140.3, 132.8, 77.4, 48.8, 47.7, 42.3, 33.1, 27.8, 27.6.

**HRMS** (ESI+) *m/z* calcd. for (C<sub>11</sub>H<sub>15</sub>O<sub>2</sub>, M+H): 179.1067, found: (M+H): 179.1065.

*((1S\*,4S\*)-Bicyclo[2.2.1]hept-5-ene-2,2-diyl)bis(phenylmethanone)* (**8**) and *phenyl((4aR\*,7aS\*)-2-phenyl-4,4a,5,7a-tetrahydrocyclopenta[*b*]pyran-3-yl)methanone* (**9**) [3]. From 1,3-diphenylpropane-1,3-dione (224 mg, 1.0 mmol), L-proline (6 mg, 0.05 mmol) and cyclopentadiene (330 mg, 5.0 mmol) compound **8** (136 mg, 45%) and compound **9** (97 mg, 32%) were obtained as a white crystalline solids.

**Major isomer 8:** <sup>1</sup>H NMR (400 MHz, CDCl<sub>3</sub>): δ 7.98-7.89 (m, 4H), 7.45-7.38 (m, 2H), 7.36-7.28 (m, 4H), 6.30 (dd, *J* = 5.7, 3.0 Hz, 1H), 5.74 (dd, *J* = 5.7, 2.9 Hz, 1H), 3.94-3.90 (m, 1H), 3.00-2.95 (m, 1H), 2.84 (dd, *J* = 12.1, 2.9 Hz, 1H), 2.18 (dd, *J* = 12.1, 3.7 Hz, 1H), 1.76-1.71 (m, 1H), 1.63-1.54 (m, 1H). <sup>13</sup>C NMR (101 MHz, CDCl<sub>3</sub>): δ 200.0, 197.0, 140.1, 137.5, 136.6, 133.1, 133.0, 132.7, 129.9 (2C), 129.2 (2C), 128.6 (2C), 128.5 (2C), 71.9, 51.6, 49.3, 43.0, 36.9.

**HRMS** (ESI+) *m/z* calcd. for (C<sub>21</sub>H<sub>19</sub>O<sub>2</sub>, M+H): 303.1380, found: (M+H): 303.1382.

**Minor isomer 9:** <sup>1</sup>H NMR (400 MHz, CDCl<sub>3</sub>): δ 7.55-7.49 (m, 2H), 7.22-7.15 (m, 3H), 7.11-6.99 (m, 5H), 6.22-6.16 (m, 1H), 6.09-6.04 (m, 1H), 5.44-5.39 (m, 1H), 3.18-3.08 (m, 1H), 2.75 (dd, *J* = 14.3, 6.1 Hz, 1H), 2.71-2.62 (m, 1H), 2.58 (dd, *J* = 14.3, 4.8 Hz, 1H), 2.34-2.25 (m, 1H). <sup>13</sup>C NMR (101 MHz, CDCl<sub>3</sub>): δ 198.4, 165.1, 139.1, 137.5, 135.6, 131.4, 130.9, 129.7 (2C), 129.6 (2C), 129.5 (2C), 127.7 (3C), 115.0, 85.6, 39.3, 37.8, 27.4.

**HRMS** (ESI+) *m/z* calcd. for (C<sub>21</sub>H<sub>19</sub>O<sub>2</sub>, M+H): 303.1380, found: (M+H): 303.1383.

*(1S\*,4S\*)-2',2'-dimethylspiro[bicyclo[2.2.2]octane-2,5'-[1,3]dioxan]-5-ene-4',6'-dione* (**10**) [4]. From Meldrum's acid (144 mg, 1.0 mmol), L-proline (6 mg, 0.05 mmol) and 1,3-cyclohexadiene (160 mg, 2.0 mmol) compound **10** (179 mg, 76%) was obtained as a white crystalline solid.

**<sup>1</sup>H NMR** (400 MHz, CDCl<sub>3</sub>): δ 6.45-6.39 (m, 1H), 6.10-6.04 (m, 1H), 2.99-2.93 (m, 1H), 2.81-2.73 (m, 1H), 2.17 (dd, *J* = 12.8, 2.7 Hz, 1H), 2.02-1.93 (m, 1H), 1.78 (s, 3H), 1.76-1.70 (m, 2H), 1.63 (s, 3H), 1.28-1.10 (m, 2H). **<sup>13</sup>C NMR** (101 MHz, CDCl<sub>3</sub>): δ 169.0, 168.9, 136.3, 128.9, 105.2, 54.5, 39.7, 32.5, 30.5, 29.2, 28.1, 22.3, 22.1.

**HRMS** (ESI+) *m/z* calcd. for (C<sub>13</sub>H<sub>17</sub>O<sub>4</sub>, M+H): 237.1121, found: (M+H): 237.1123.

*3,3,8,9-Tetramethyl-2,4-dioxaspiro[5.5]undec-8-ene-1,5-dione* (**12**) [5]. From Meldrum's acid (144 mg, 1.0 mmol), L-proline (6 mg, 0.05 mmol) and 2,3-dimethyl-1,3-butadiene (164 mg, 2.0 mmol) compound **12** (231 mg, 97%) was obtained as a white crystalline solid.

**<sup>1</sup>H NMR** (400 MHz, CDCl<sub>3</sub>): δ 2.49-2.48 (m, 2H), 2.12-2.11 (m, 4H), 1.75 (s, 3H), 1.72 (s, 3H), 1.68 (s, 3H), 1.65 (s, 3H). **<sup>13</sup>C NMR** (101 MHz, CDCl<sub>3</sub>): δ 169.9 (2C), 124.9, 121.1, 104.8, 48.6, 36.7, 31.4, 29.7, 28.6, 28.0, 19.1, 18.7.

**HRMS** (ESI+) *m/z* calcd. for (C<sub>13</sub>H<sub>19</sub>O<sub>4</sub>, M+H): 239.1278, found: (M+H): 239.1270.

*1,1'-(3,4-dimethylcyclohex-3-ene-1,1-diyl)bis(ethan-1-one)* (**13**). From acetylacetone (100 mg, 1.0 mmol), L-proline (6 mg, 0.05 mmol) and 2,3-dimethyl-1,3-butadiene (164 mg, 2.0 mmol) compound **13** (80 mg, 41%) was obtained as a colorless oil.

**<sup>1</sup>H NMR** (400 MHz, CDCl<sub>3</sub>): δ 2.34 (bs, 2H), 2.04 (s, 6H), 2.04-2.01 (m, 2H), 1.92-1.85 (m, 2H), 1.61 (s, 3H), 1.50 (s, 3H). **<sup>13</sup>C NMR** (101 MHz, CDCl<sub>3</sub>): δ 206.7 (2C), 125.4, 122.8, 67.1, 35.1, 28.8, 27.3, 26.1 (2C), 19.2, 18.7.

**HRMS** (ESI+) *m/z* calcd. for (C<sub>12</sub>H<sub>19</sub>O<sub>2</sub>, M+H): 195.1380, found: (M+H): 195.1381.

*3,3,9-Trimethyl-2,4-dioxaspiro[5.5]undec-8-ene-1,5-dione* (**14a**) and *3,3,8-trimethyl-2,4-dioxaspiro[5.5]undec-8-ene-1,5-dione* (**14b**) [6]. From Meldrum's acid (144 mg, 1.0 mmol), L-proline (6 mg, 0.05 mmol) and isoprene (340 mg, 5.0 mmol) the mixture of compounds **14a** and **14b** in 95/5 ratio (204 mg, 91%) was obtained as a white crystalline solid.

**Major isomer 14a:** **<sup>1</sup>H NMR** (400 MHz, CDCl<sub>3</sub>): δ 5.38-5.33 (m, 1H), 2.59-2.55 (m, 2H), 2.17-2.12 (m, 2H), 2.11-2.06 (m, 2H), 1.74-1.71 (m, 3H), 1.70-1.66 (m, 6H). **<sup>13</sup>C NMR** (101 MHz, CDCl<sub>3</sub>): δ 169.8 (2C), 133.1, 116.1, 104.7, 46.9, 31.5, 30.9, 29.5, 28.5, 26.4, 23.4.

**Minor isomer 14b:** **<sup>1</sup>H NMR** (400 MHz, CDCl<sub>3</sub>): δ 5.53-5.51 (m, 1H), 2.46-2.44 (m, 2H), 2.17-2.12 (m, 2H), 2.11-2.06 (m, 2H), 1.74-1.71 (m, 3H), 1.70-1.66 (m, 6H).

**HRMS** (ESI+) *m/z* calcd. for (C<sub>12</sub>H<sub>17</sub>O<sub>4</sub>, M+H): 225.1121, found: (M+H): 225.1114.

*Ethyl 1-acetyl-4-methylcyclohex-3-ene-1-carboxylate* (**15a**) and *ethyl 1-acetyl-3-methylcyclohex-3-ene-1-carboxylate* (**15b**). From acetoacetic ester (130 mg, 1.0 mmol), L-proline (6 mg, 0.05 mmol) and isoprene (340 mg, 5.0 mmol) the mixture of compounds **15a** and **15b** >95/5 ratio (19 mg, 9%) was obtained as a colorless oil.

**Major isomer 15a:**  $^1\text{H NMR}$  (400 MHz,  $\text{CDCl}_3$ ):  $\delta$  5.40-5.31 (m, 1H), 4.22-4.13 (m, 2H), 2.58-2.47 (m, 1H), 2.46-2.36 (m, 1H), 2.17 (s, 3H), 2.16-2.10 (m, 1H), 2.08-1.89 (m, 3H), 1.61 (s, 3H), 1.24 (d,  $J = 7.1$  Hz, 3H).  $^{13}\text{C NMR}$  (101 MHz,  $\text{CDCl}_3$ ):  $\delta$  205.4, 172.3, 133.7, 118.1, 61.5, 59.0, 30.1, 27.3, 27.2, 25.9, 23.4, 14.2.

**HRMS** (ESI+)  $m/z$  calcd. for ( $\text{C}_{12}\text{H}_{19}\text{O}_3$ , M+H): 211.1329, found: (M+H): 211.1337.

*1,1'-(4-Methylcyclohex-3-ene-1,1-diyl)bis(ethan-1-one)* (**16a**) and *1,1'-(3-methylcyclohex-3-ene-1,1-diyl)bis(ethan-1-one)* (**16b**). From acetylacetone (100 mg, 1.0 mmol), L-proline (6 mg, 0.05 mmol) and isoprene (340 mg, 5.0 mmol) the mixture of compounds **16a** and **16b** in 87/13 ratio (50 mg, 28%) was obtained as a light yellow oil.

**Major isomer 16a:**  $^1\text{H NMR}$  (400 MHz,  $\text{CDCl}_3$ ):  $\delta$  5.38-5.33 (m, 1H), 2.48-2.44 (m, 2H), 2.14-2.07 (m, 8H), 1.96-1.90 (m, 2H), 1.59 (s, 3H).  $^{13}\text{C NMR}$  (101 MHz,  $\text{CDCl}_3$ ):  $\delta$  206.8 (2C), 134.1, 118.1, 66.7, 29.3, 27.3, 27.1, 26.2 (2C), 23.3.

**Minor isomer 16b:**  $^1\text{H NMR}$  (400 MHz,  $\text{CDCl}_3$ ):  $\delta$  5.35-5.30 (m, 1H), 2.37-2.35 (m, 2H), 2.14-2.07 (m, 8H), 1.96-1.90 (m, 2H), 1.70 (s, 3H).  $^{13}\text{C NMR}$  (101 MHz,  $\text{CDCl}_3$ ):  $\delta$  206.6 (2C), 131.3, 120.7, 67.2, 33.7, 29.3, 26.5 (2C), 23.7, 22.6.

**HRMS** (ESI+)  $m/z$  calcd. for ( $\text{C}_{11}\text{H}_{17}\text{O}_2$ , M+H): 181.1223, found: (M+H): 181.1222.

## 2. $^1\text{H}$ and $^{13}\text{C}$ NMR spectra of the compounds 3–10 and 12–16

sde-1748-2.1.1.1r

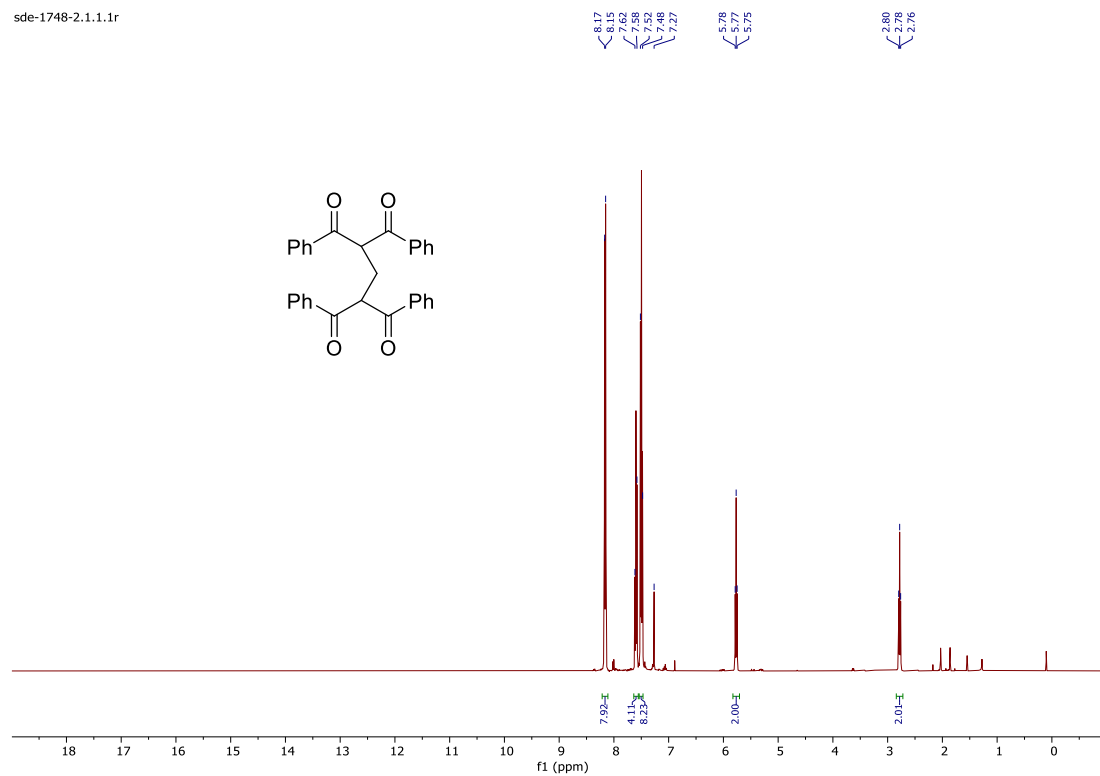

Figure S1.  $^1\text{H}$  NMR spectra of compound 3.

sde-1748-2.2.1.1r

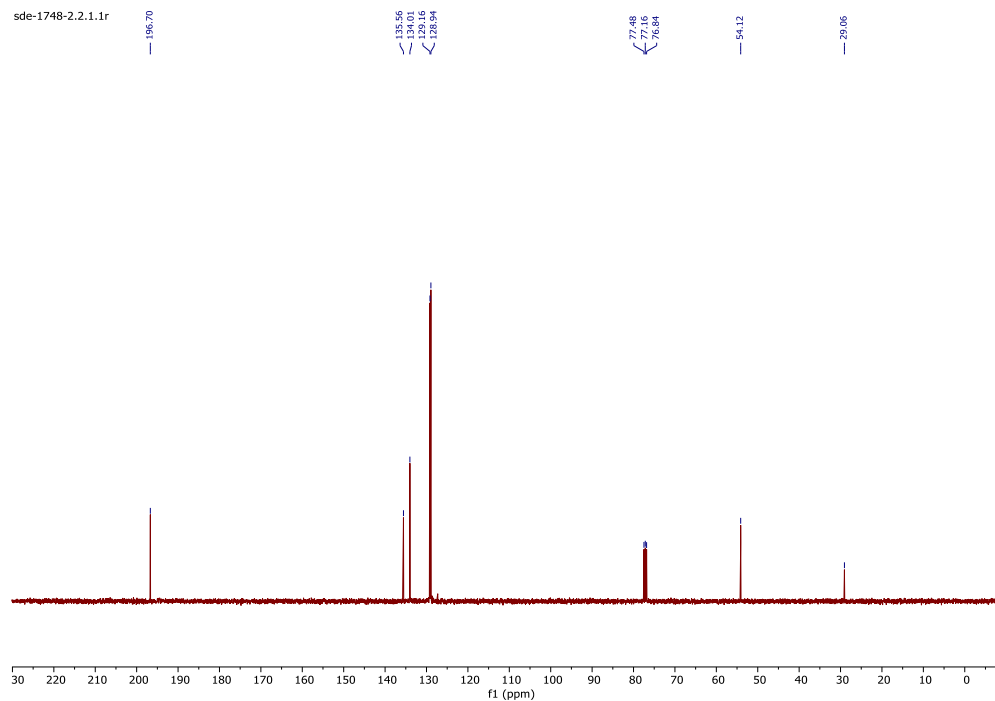

Figure S2.  $^{13}\text{C}$  NMR spectra of compound 3.

SDE-1688-1.1.1.1r

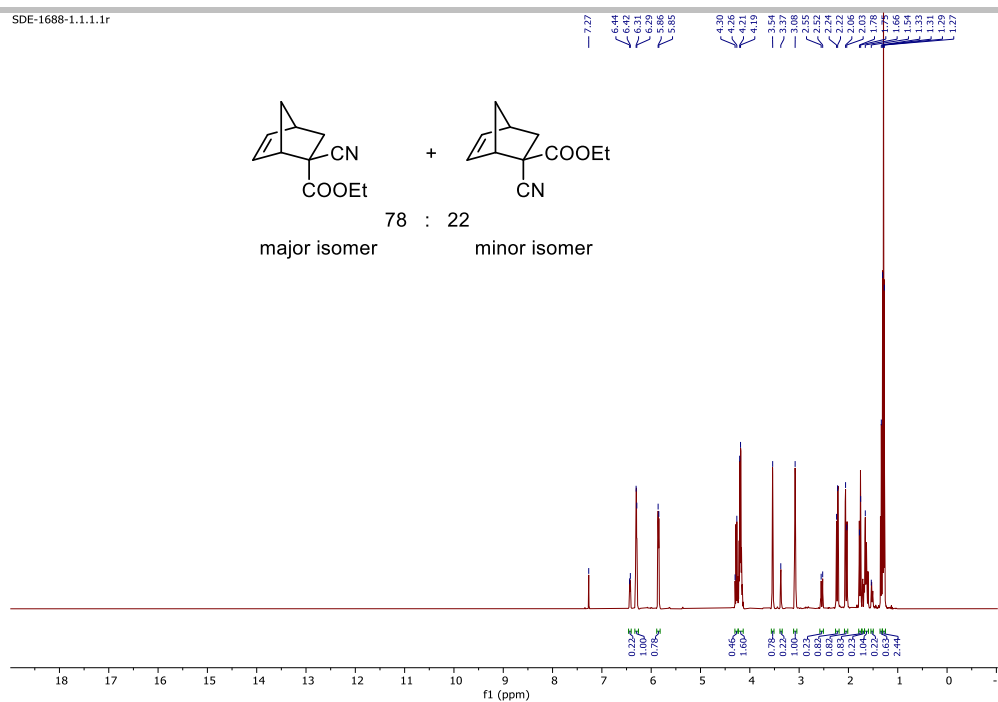Figure S3. <sup>1</sup>H NMR spectra of the mixture of compounds **4a** and **4b**.

SDE-1688.2.1.1.r

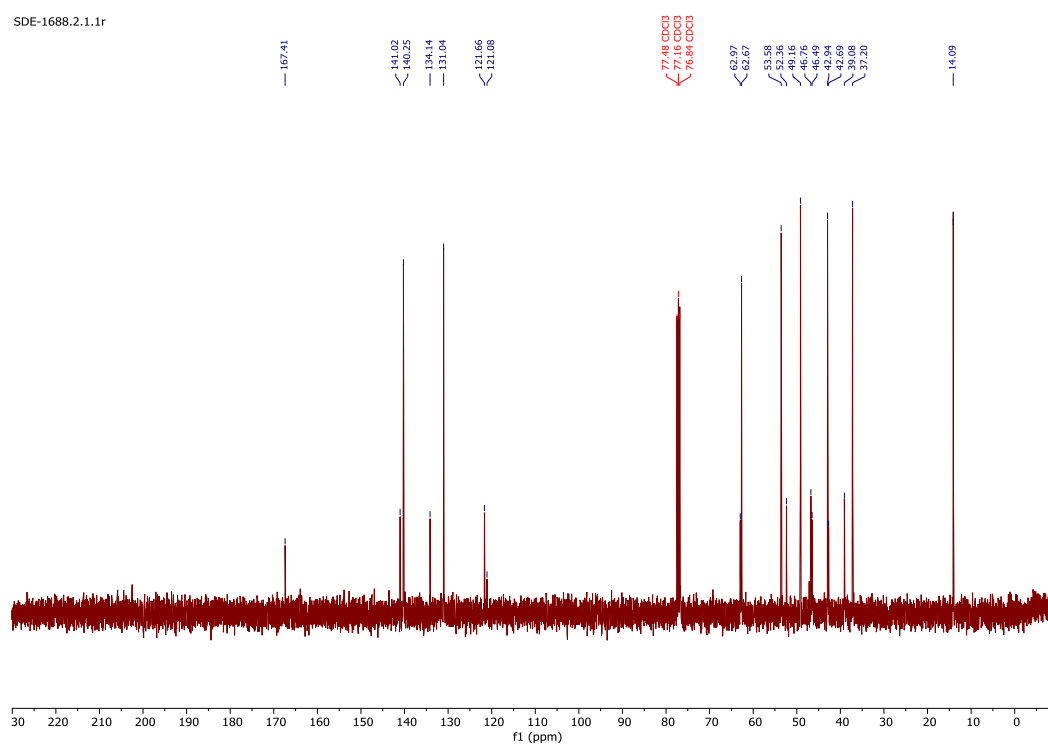Figure S4. <sup>13</sup>C NMR spectra of the mixture of compounds **4a** and **4b**.



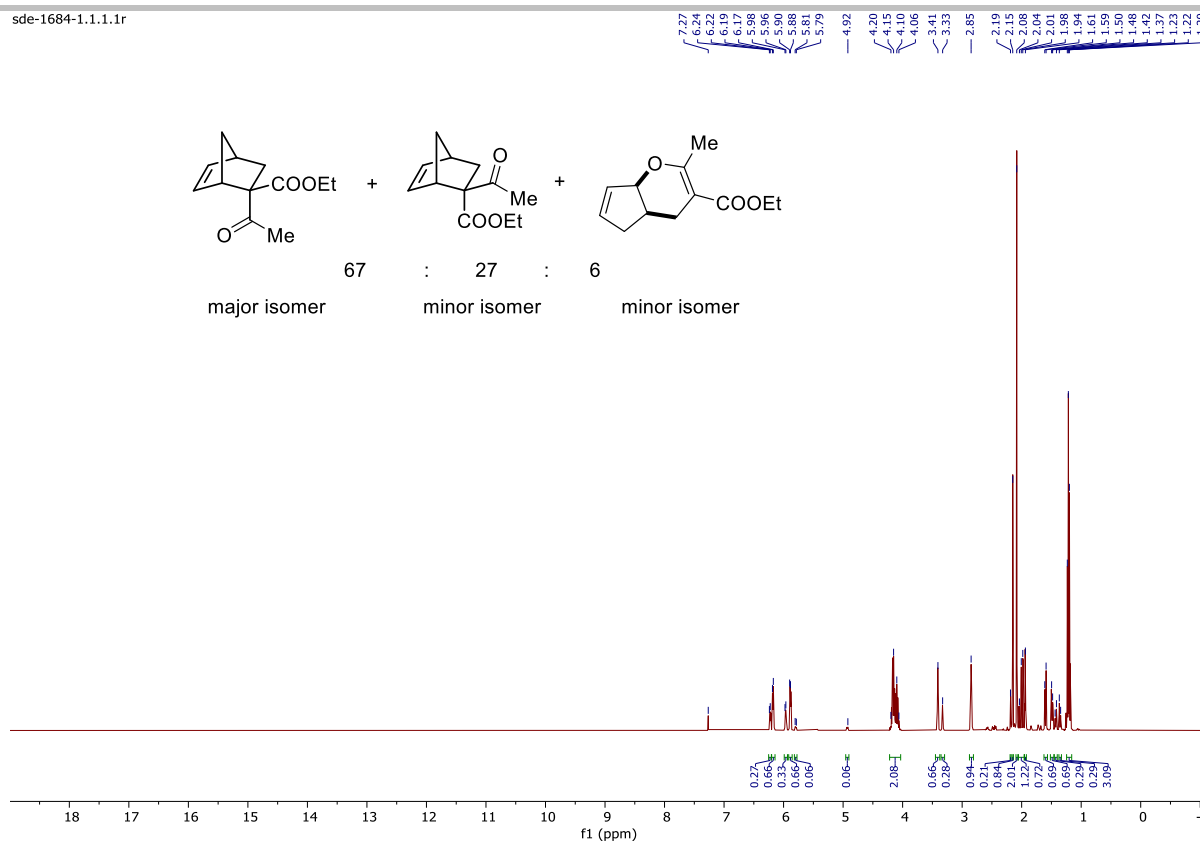Figure S5.  $^1\text{H}$  NMR spectra of the mixture of compounds **5a**, **5b** and **6**.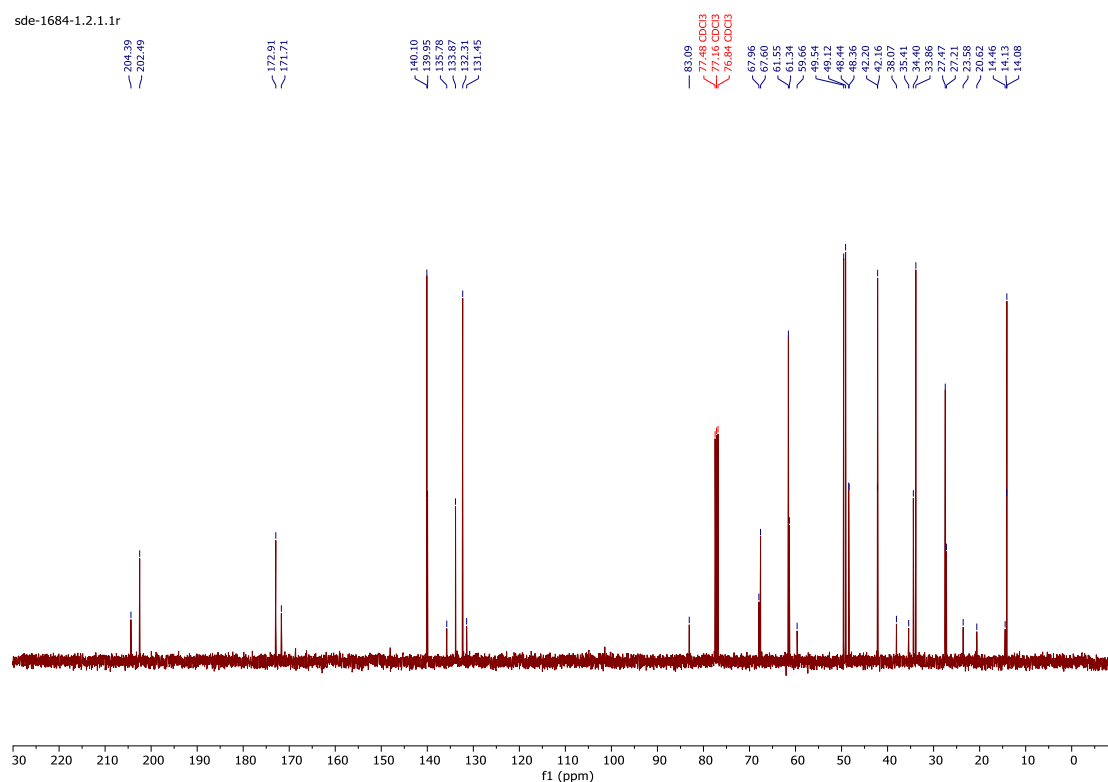Figure S6.  $^{13}\text{C}$  NMR spectra of the mixture of compounds **5a**, **5b** and **6**.

sde-1889.1.1.1r

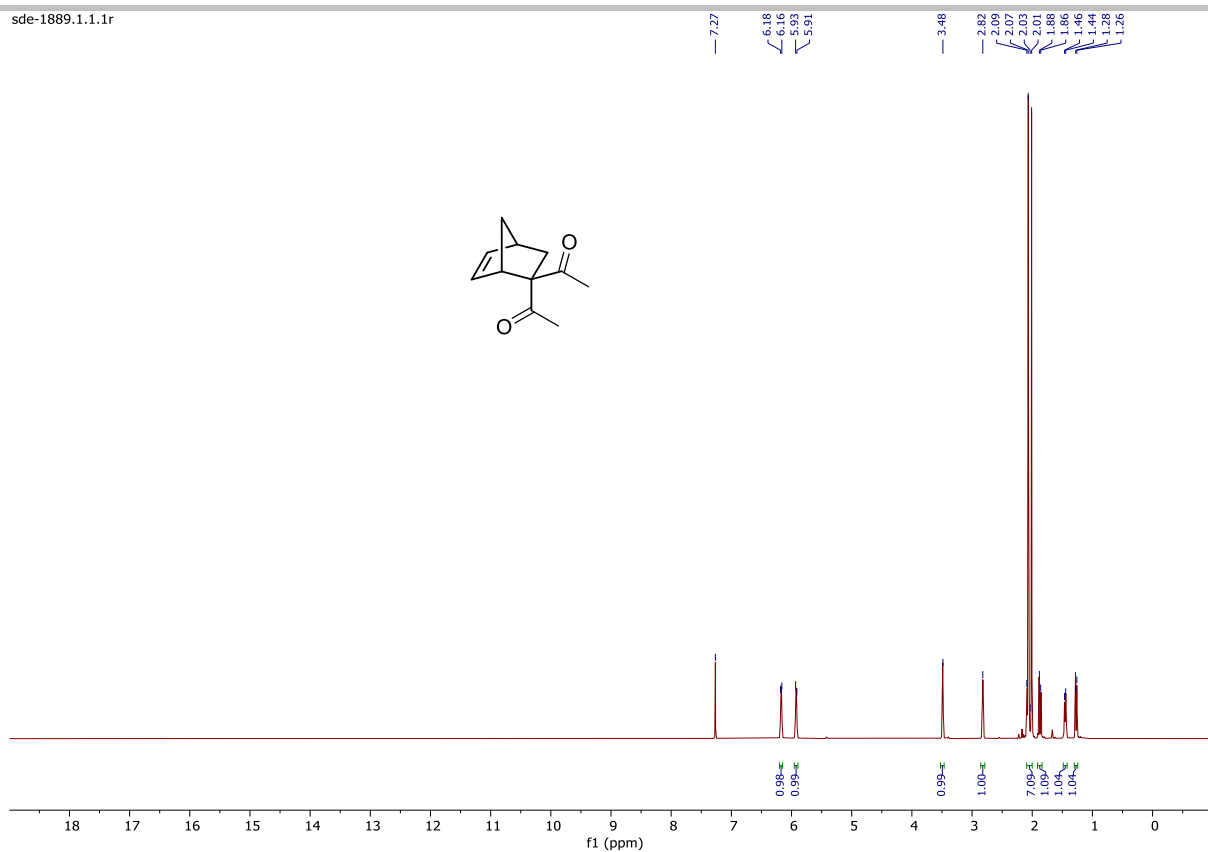

Figure S7. <sup>1</sup>H NMR spectra of compound **7**.

sde-1609-1-13c.2.1.1r

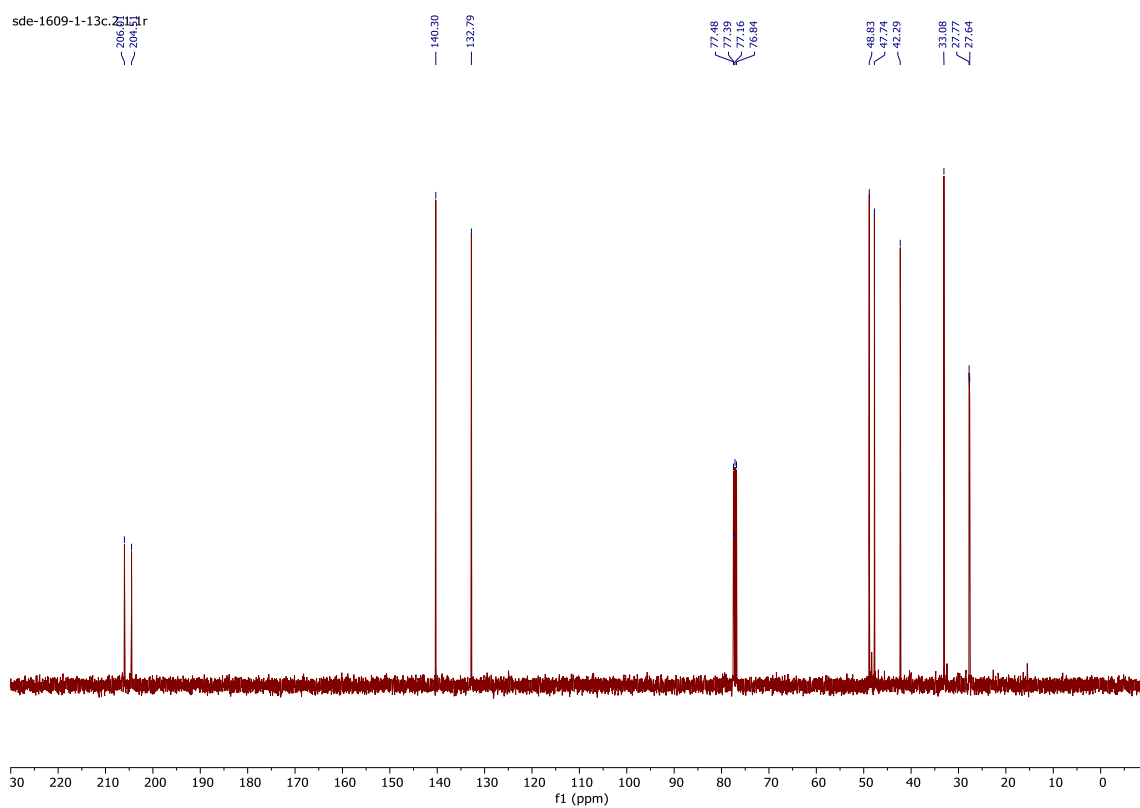

Figure S8. <sup>13</sup>C NMR spectra of compound **7**.

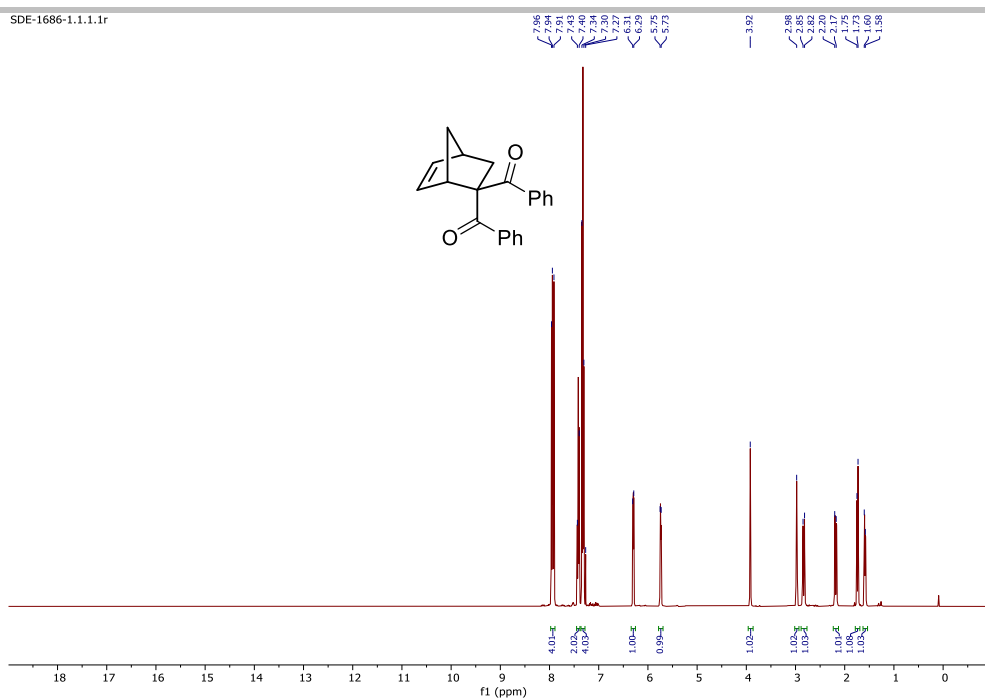

Figure S9.  $^1\text{H}$  NMR spectra of compound **8**.

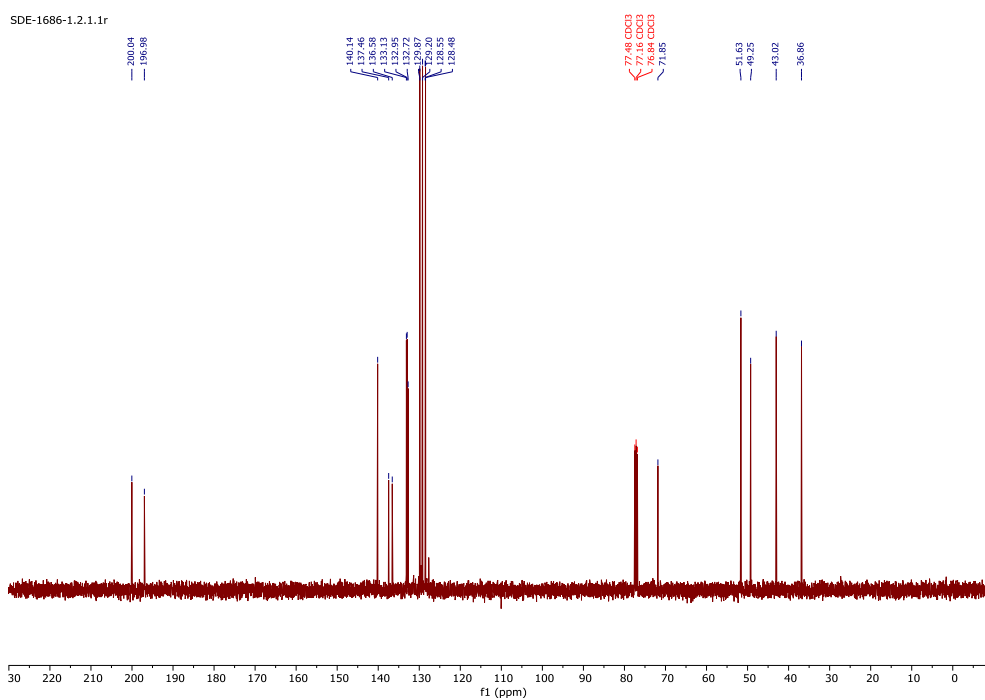

Figure S10.  $^{13}\text{C}$  NMR spectra of compound **8**.

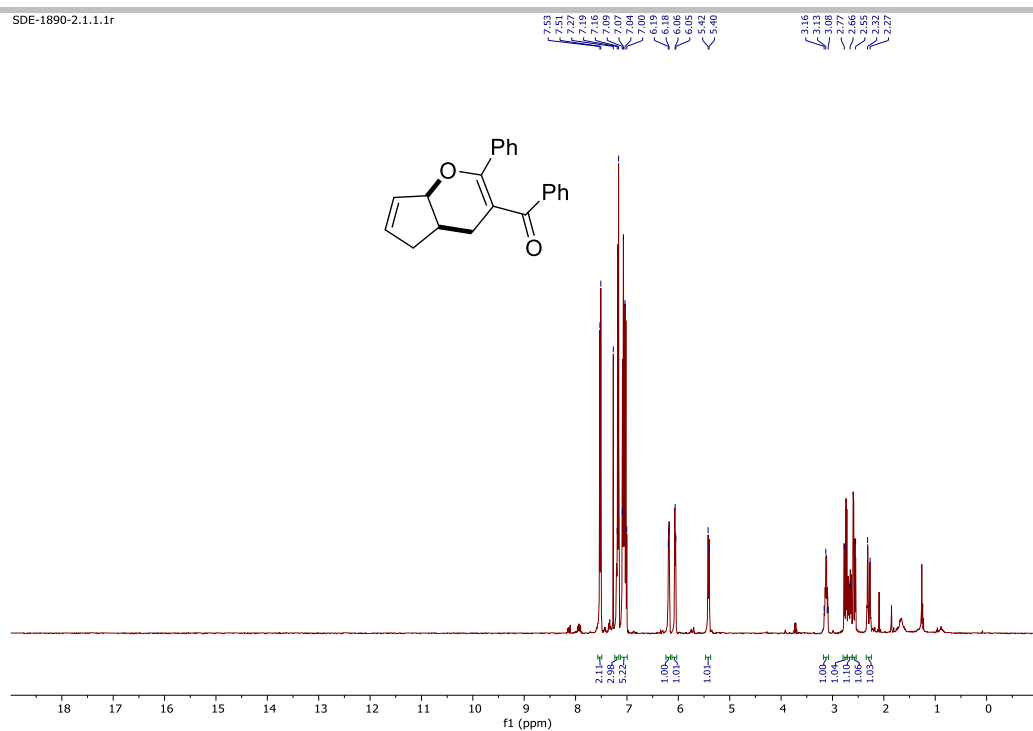Figure S11. <sup>1</sup>H NMR spectra of compound 9.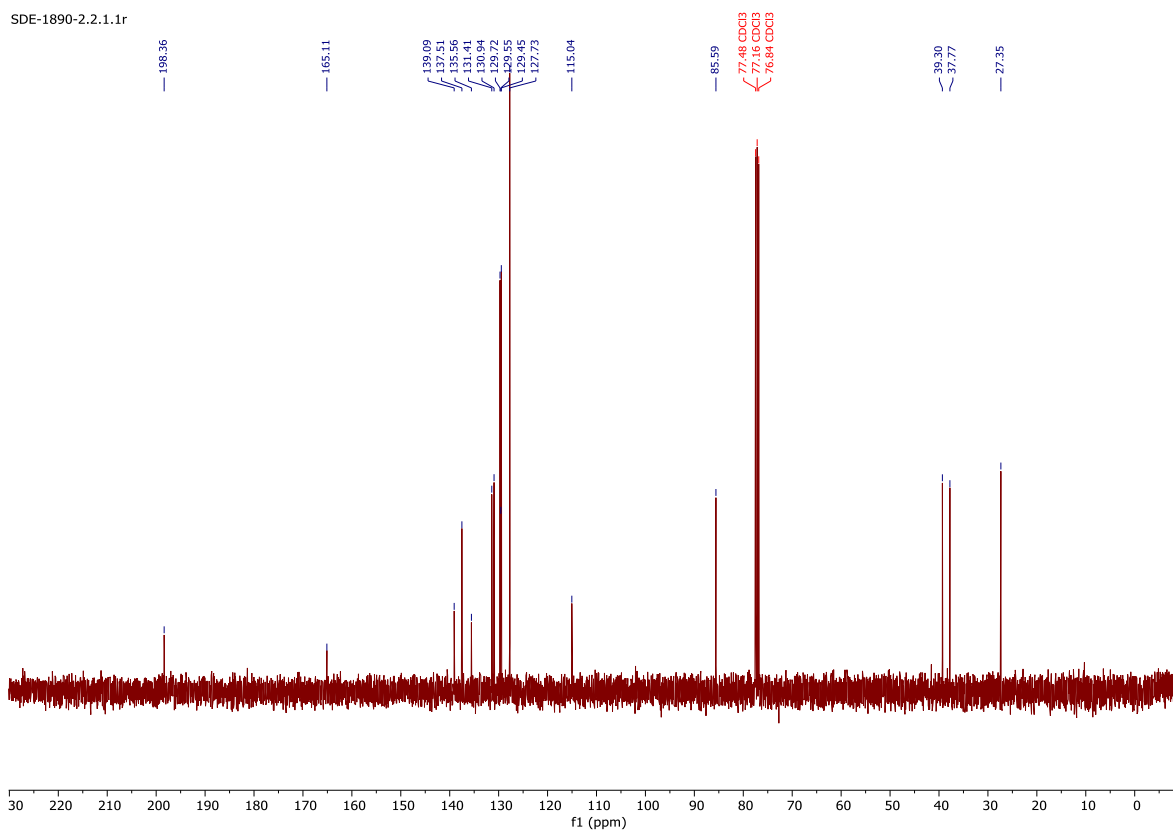Figure S12. <sup>13</sup>C NMR spectra of compound 9.

SDE-1845-1.1.1.1r

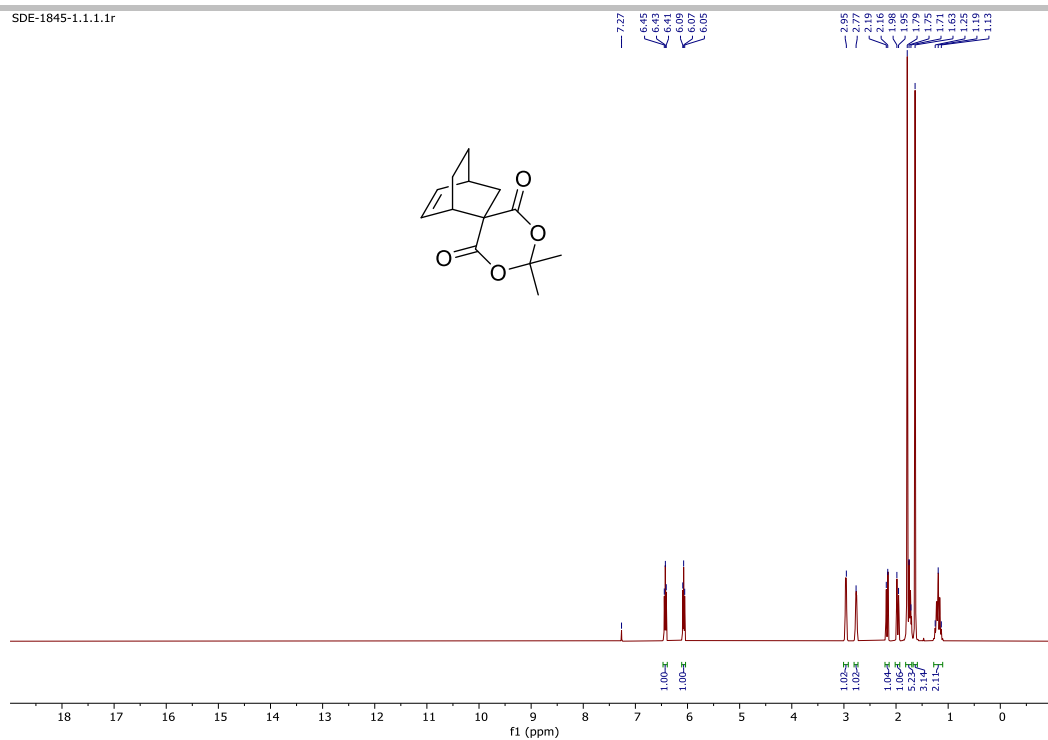

Figure S13.  $^1\text{H}$  NMR spectra of compound **10**.

SDE-1845-1.2.1.1r

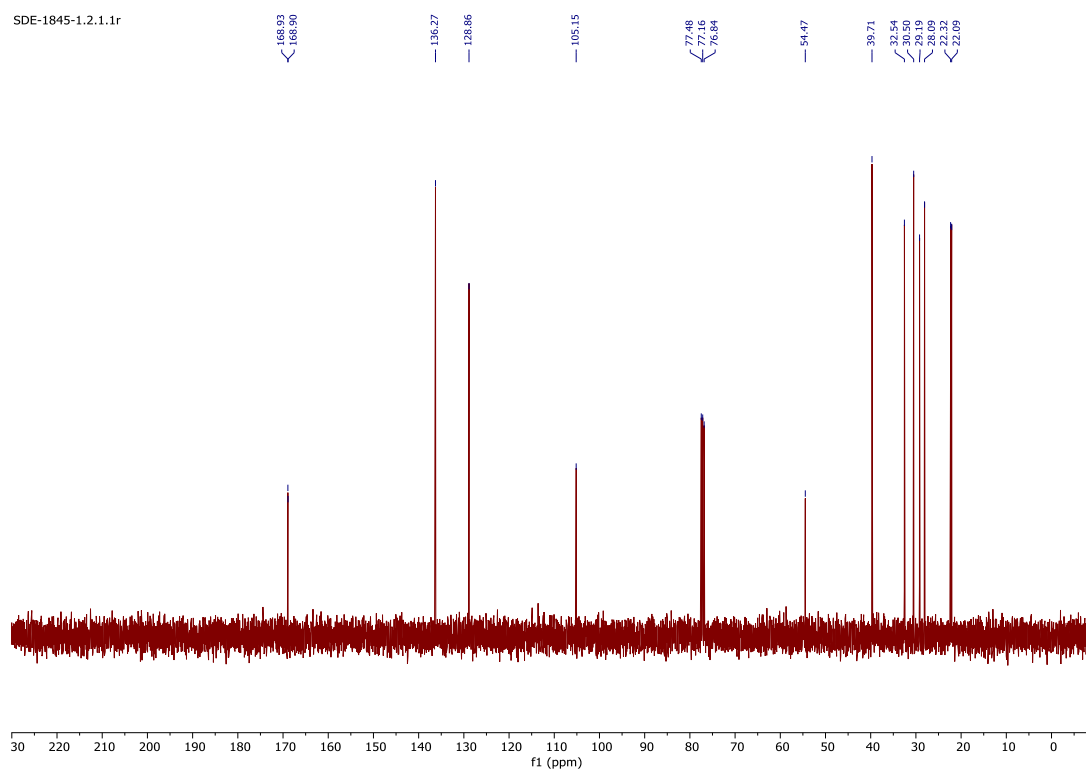

Figure S14.  $^{13}\text{C}$  NMR spectra of compound **10**.

SDE-1475-1.1.1.1r

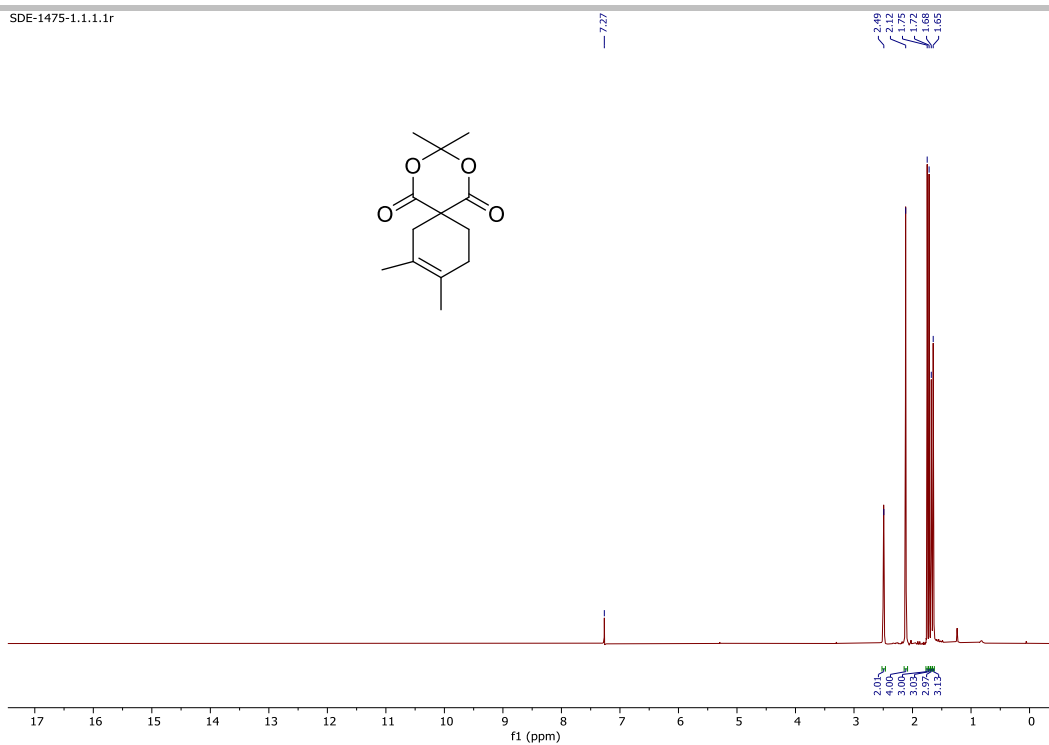

Figure S15. <sup>1</sup>H NMR spectra of compound 12.

SDE-1475-1.2.1.1r

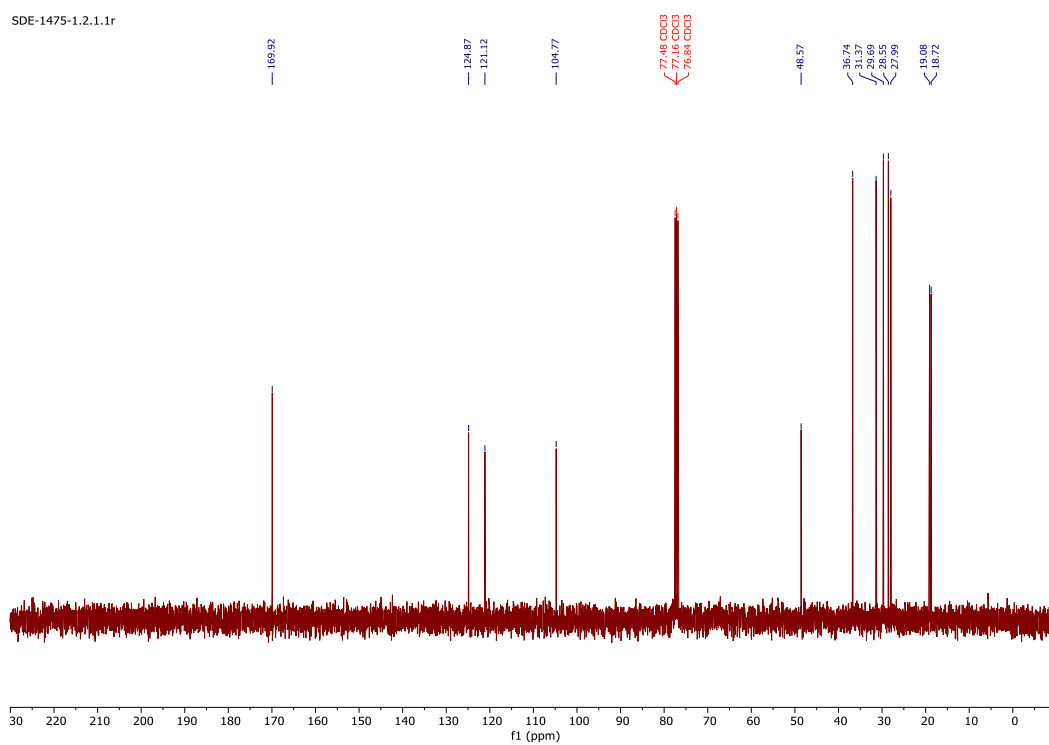

Figure S16. <sup>13</sup>C NMR spectra of compound 12.

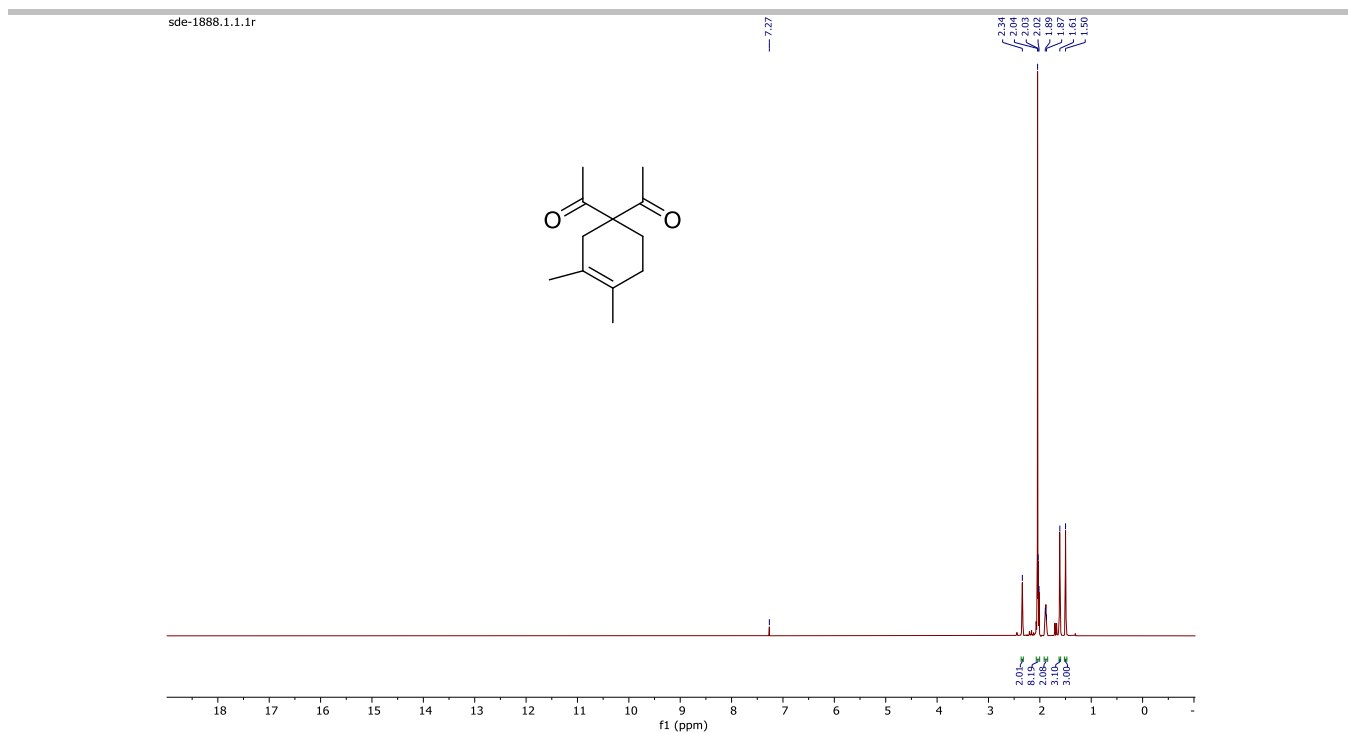

Figure S17.  $^1\text{H}$  NMR spectra of compound **13**.

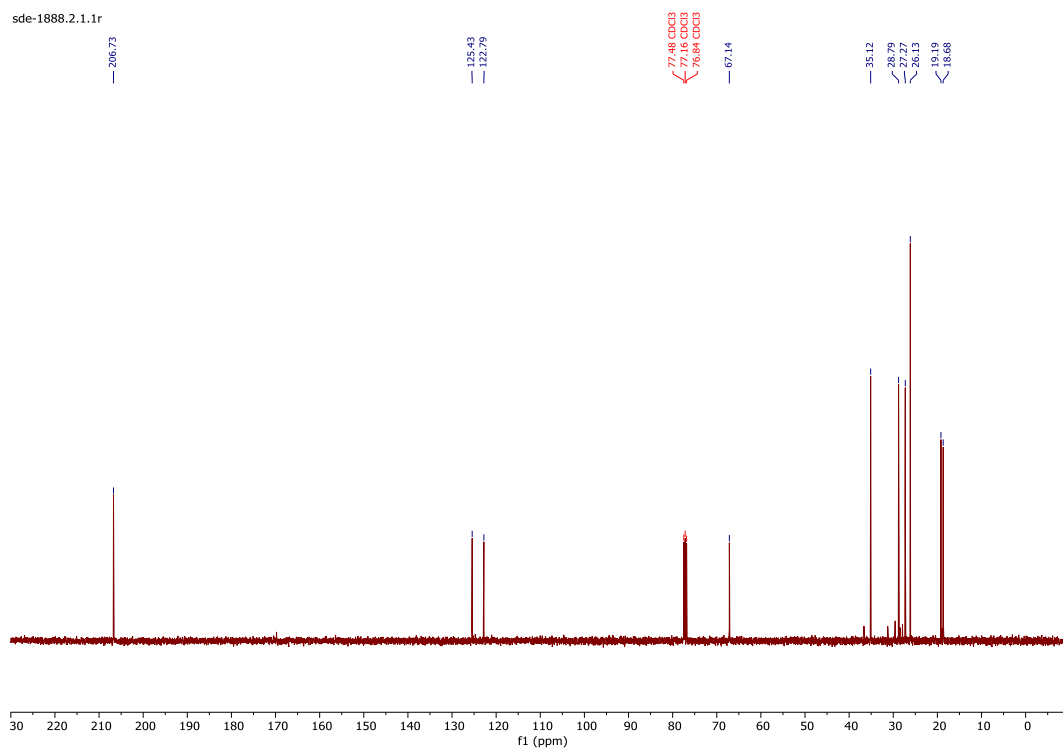

Figure S18.  $^{13}\text{C}$  NMR spectra of compound **13**.





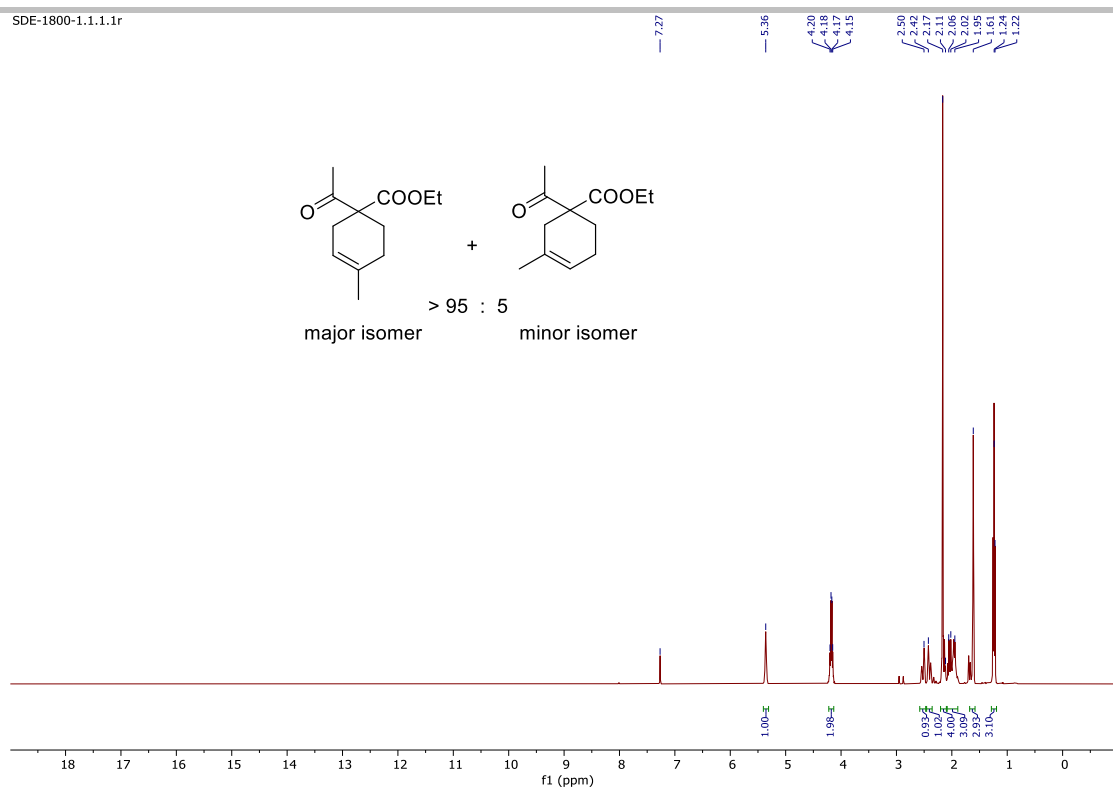Figure S21.  $^1\text{H}$  NMR spectra of the mixture of compounds **15a** and **15b**.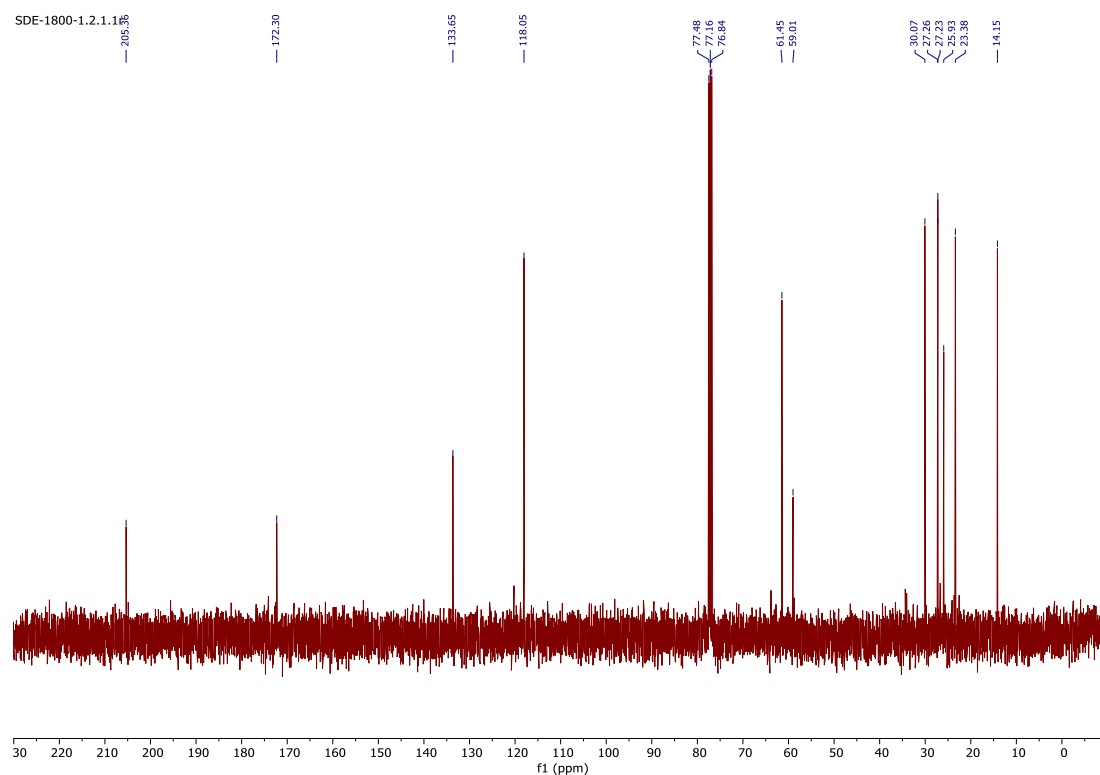Figure S22.  $^{13}\text{C}$  NMR spectra of the mixture of compounds **15a** and **15b**.

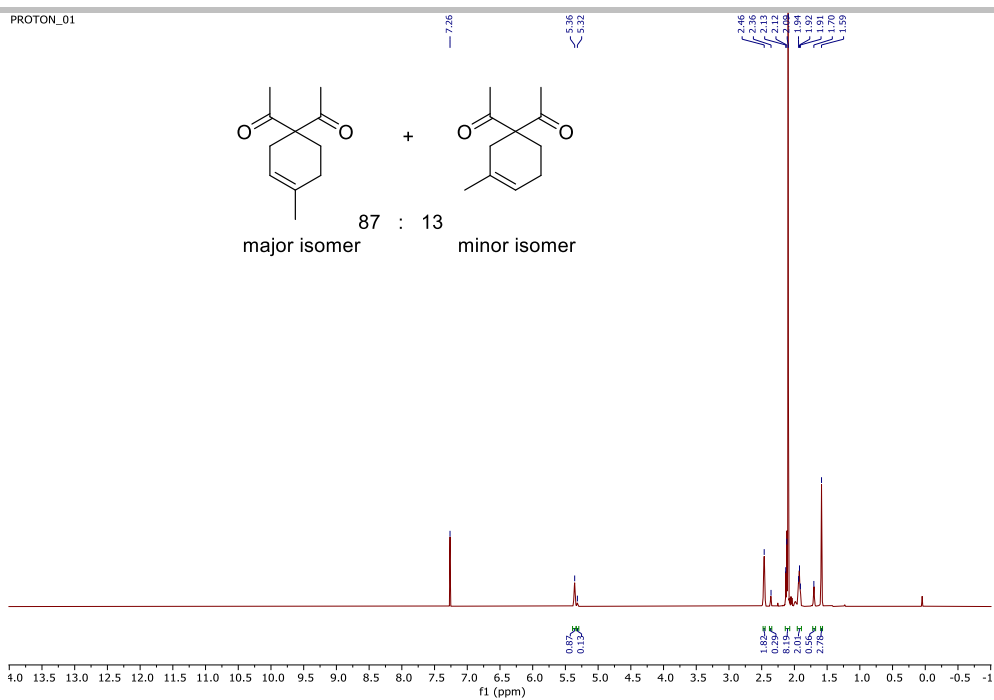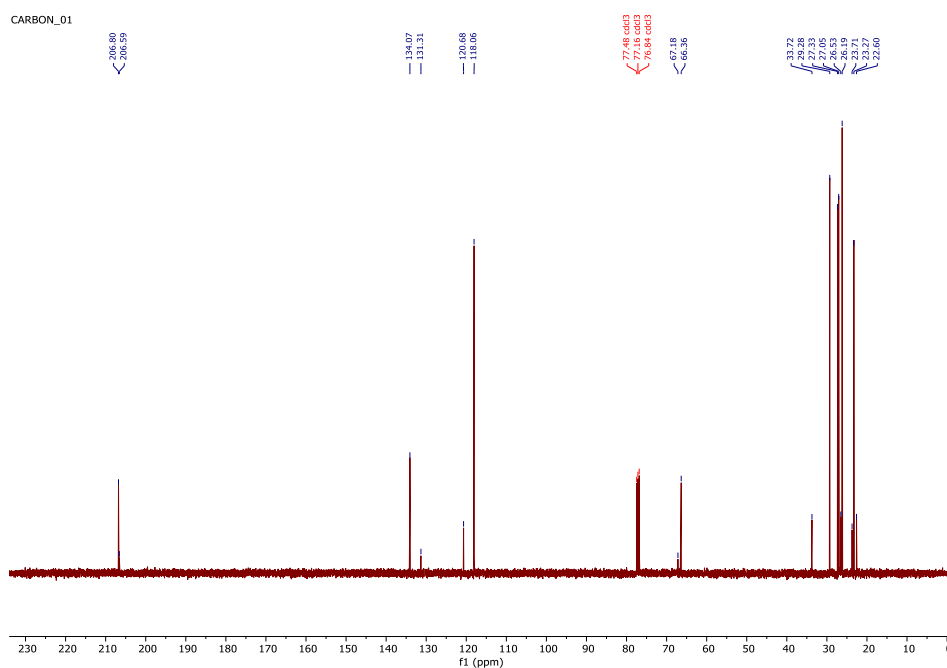

### 3. $^1\text{H}$ NMR spectra of reaction mixtures formed during bromination of compounds **4** and **5**

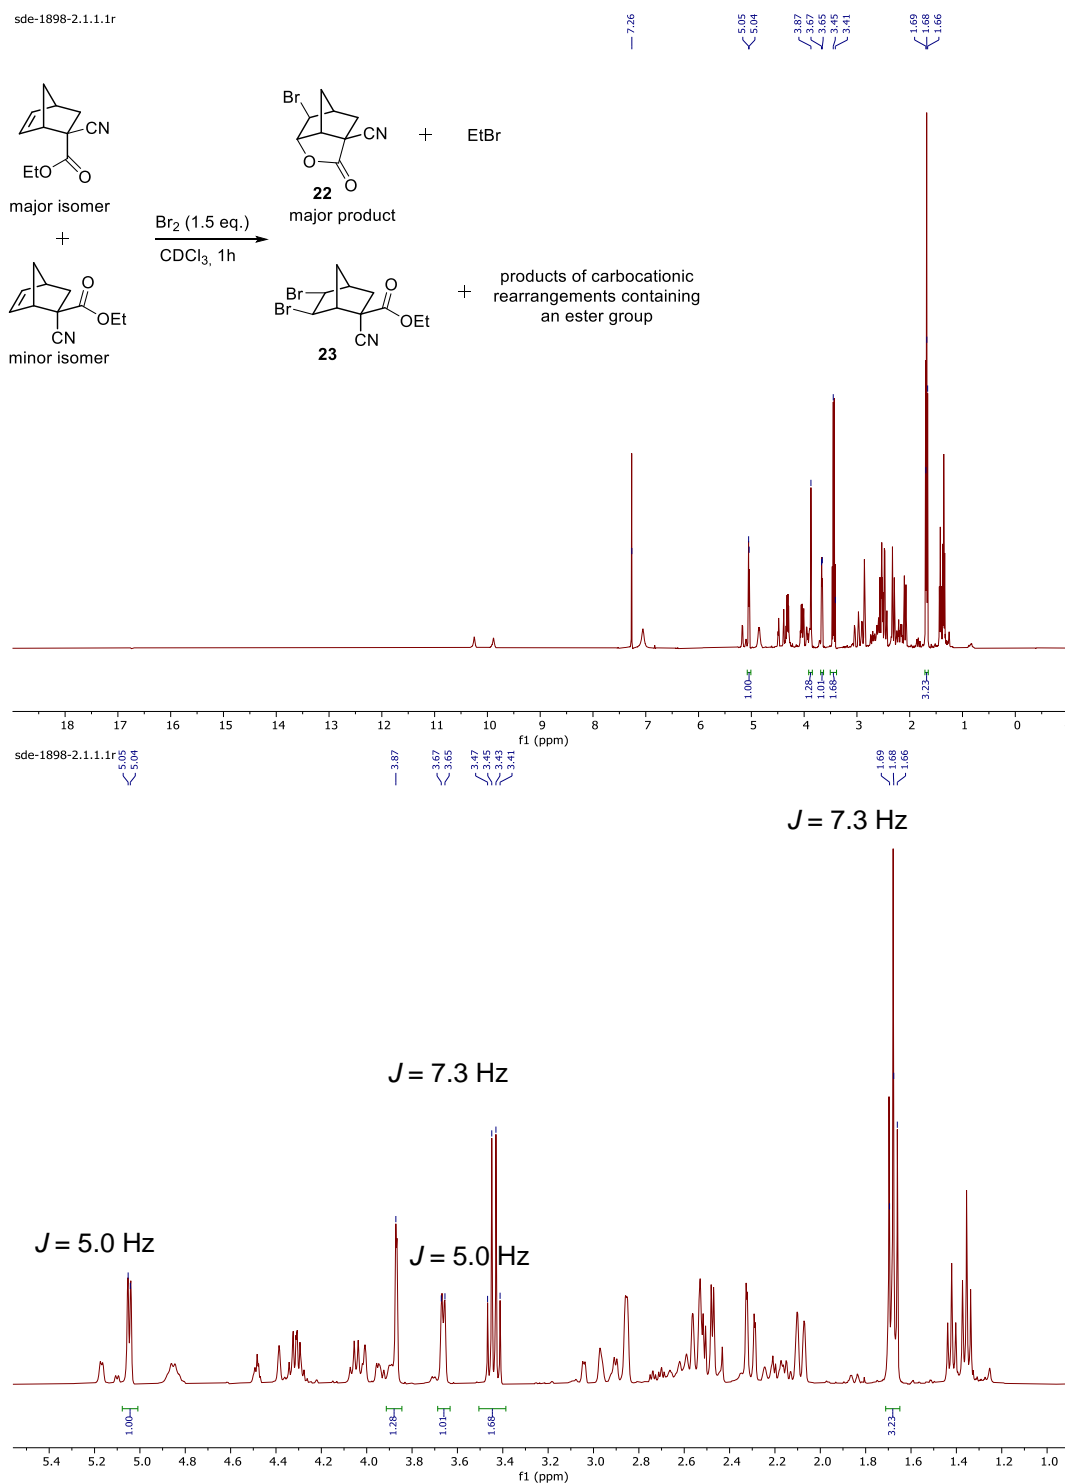

Figure S25.  $^1\text{H}$  NMR spectrum of the reaction mixture of bromination of compounds **4a** and **4b**. The characteristic signals of the main reaction products, as well as  $\text{EtBr}$ , are labeled.

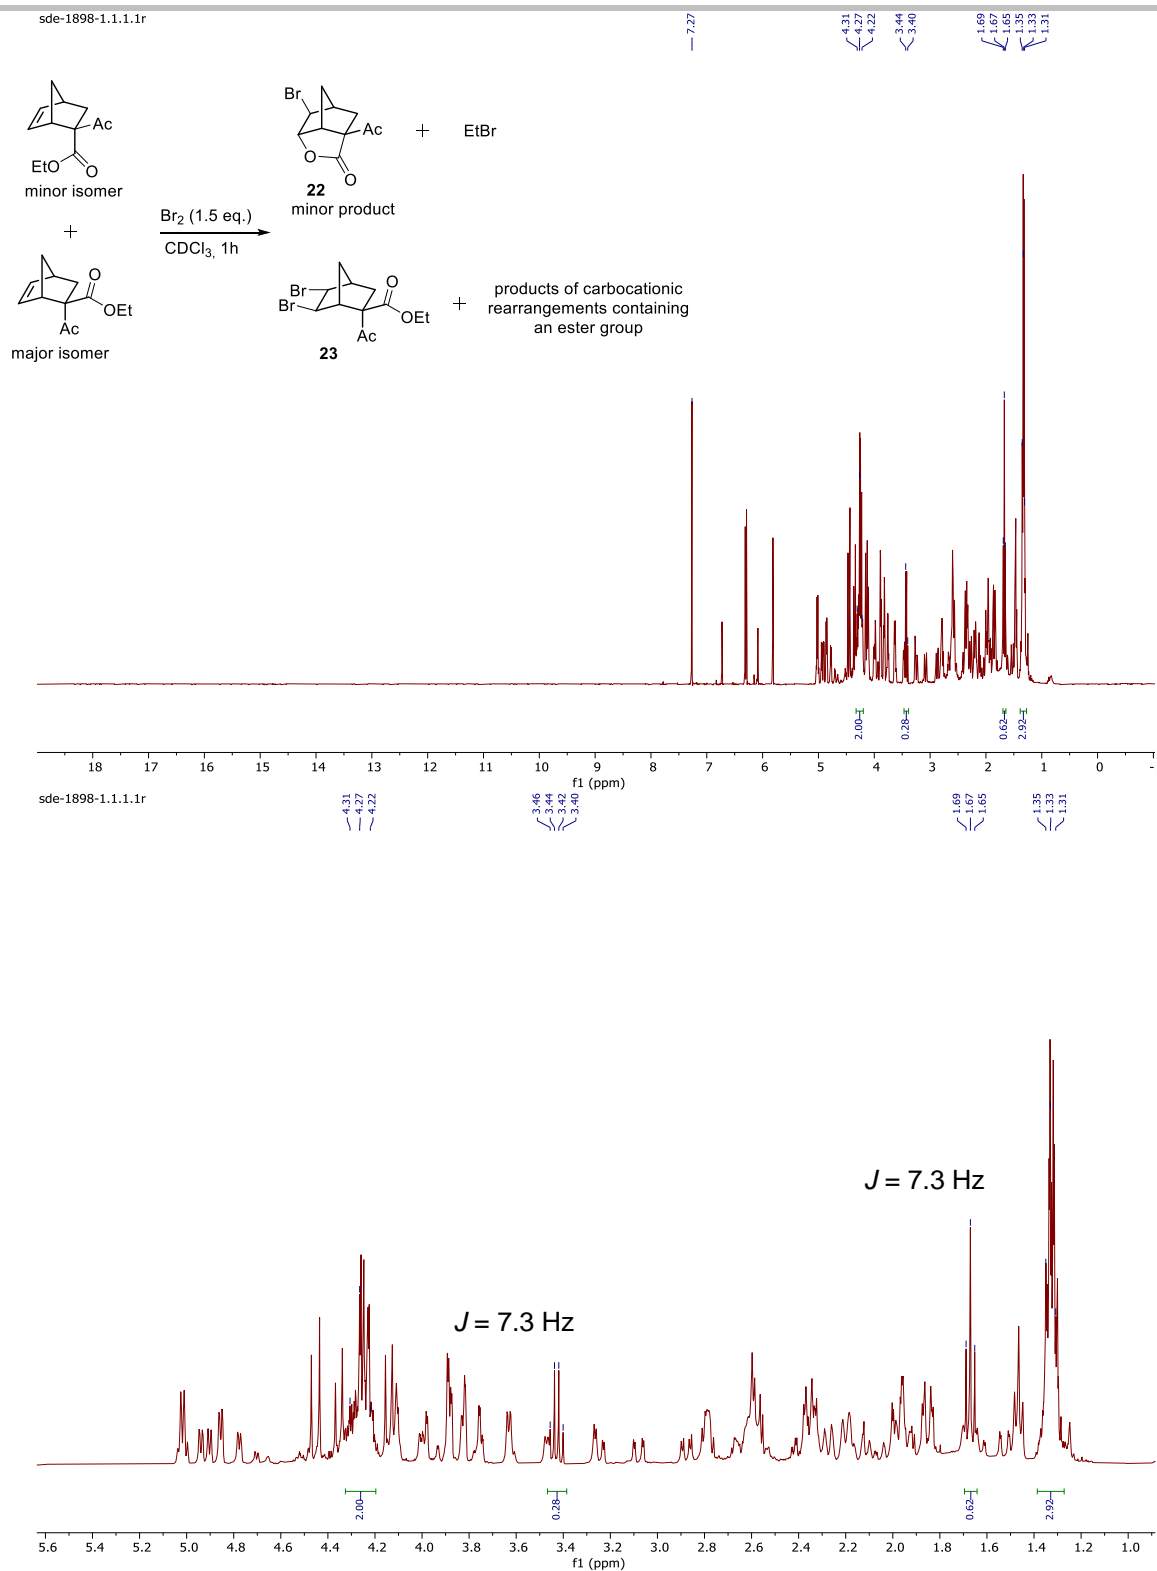

Figure S26.  $^1\text{H}$  NMR spectrum of the reaction mixture of bromination of compounds **5a** and **5b**. The characteristic signals of the main reaction products, as well as EtBr, are labeled.

#### 4. LC-MS/MS spectra of compound mixtures

##### HPLC-MS/MS method parameters for compound analysis

| Agilent 1290 Infinity II – 5500 QTRAP (Sciex) |                                           |                   |      |                   |
|-----------------------------------------------|-------------------------------------------|-------------------|------|-------------------|
| Chromatographic parameters                    |                                           |                   |      |                   |
| Solvent A                                     | 0,1% HCOOH in H <sub>2</sub> O            |                   |      |                   |
| Solvent B                                     | 0,1% HCOOH in CH <sub>3</sub> CN          |                   |      |                   |
| Chromatographic column                        | Eclipse XDB C18, 150*3 mm, 5 μm (Agilent) |                   |      |                   |
| Gradient                                      | Time, min                                 | Flow rate, mL/min | %A   | %B                |
|                                               | 0,00                                      | 0,4               | 80,0 | 80,0              |
|                                               | 1,00                                      | 0,4               | 80,0 | 80,0              |
|                                               | 10,0                                      | 0,4               | 20,0 | 20,0              |
|                                               | 12,0                                      | 0,4               | 20,0 | 20,0              |
|                                               | 12,1                                      | 0,4               | 80,0 | 80,0              |
|                                               | 15,0                                      | 0,4               | 80,0 | 80,0              |
| Column temperature                            | 40°C                                      |                   |      |                   |
| Autosampler temperature                       | 8°C                                       |                   |      |                   |
| Injection volume                              | 10 μL                                     |                   |      |                   |
| Total analysis time                           | 15 min                                    |                   |      |                   |
| MS/MS parameters                              |                                           |                   |      |                   |
| Ion source type                               |                                           |                   |      | Turbo Spray       |
| Ionization mode                               |                                           |                   |      | Positive/Negative |
| Source temperature, °C                        |                                           |                   |      | 630               |
| Nebulizer voltage (IS), V                     |                                           |                   |      | 5500              |
| Curtain gas (CUR), psi                        |                                           |                   |      | 30                |
| Nebulizer gas (GS1), psi                      |                                           |                   |      | 70                |
| Heater gas (GS2), psi                         |                                           |                   |      | 70                |
| Mass range                                    |                                           |                   |      | 100 - 1000        |
| Scanning quadrupole                           |                                           |                   |      | Q3                |
| Declustering potential, V                     |                                           |                   |      | 60                |

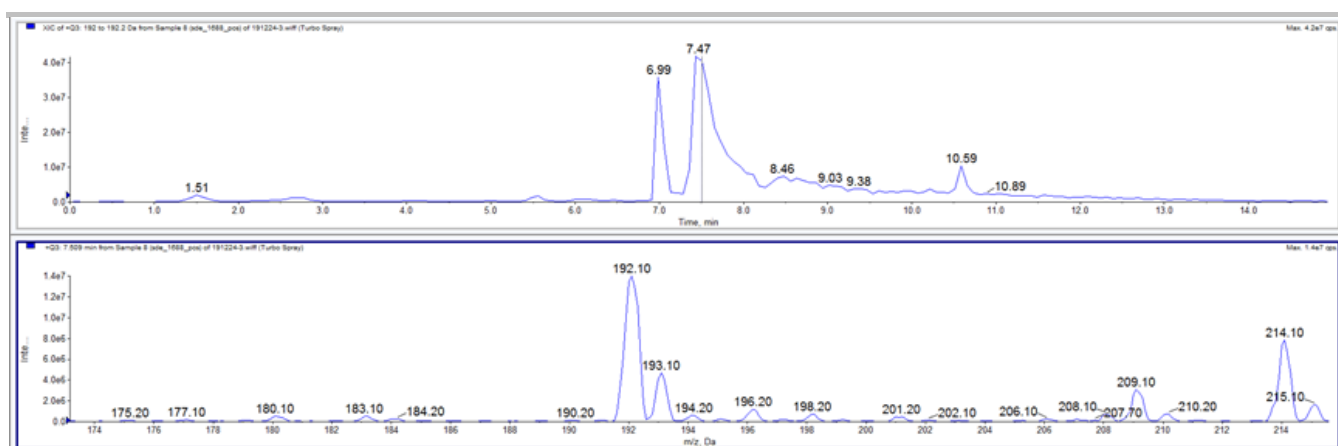

Figure S27. LC-MS/MS spectra of the compounds **4a** and **4b** mixture.

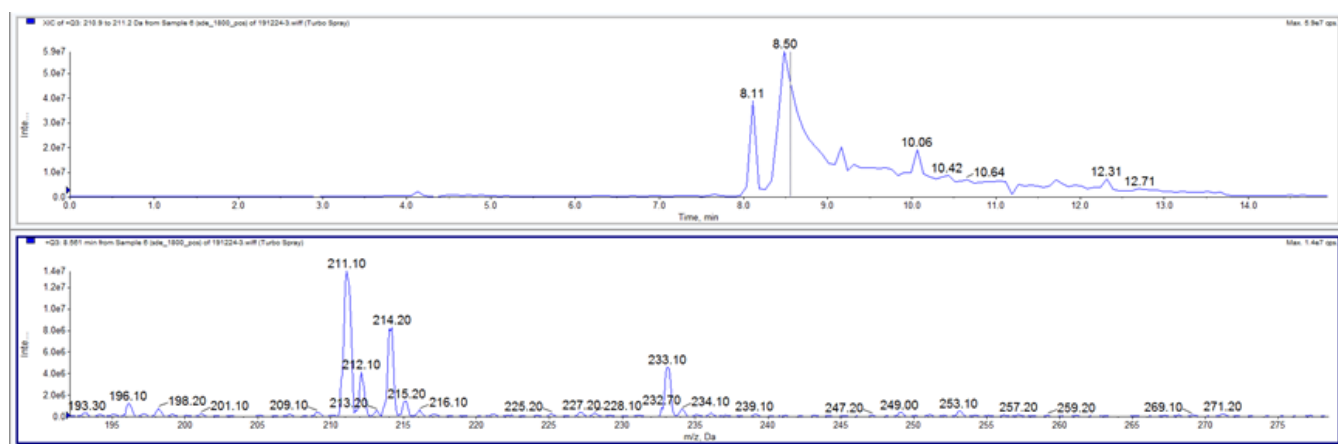

Figure S28. LC-MS/MS spectra of the compounds **5a**, **5b** and **6** mixture.

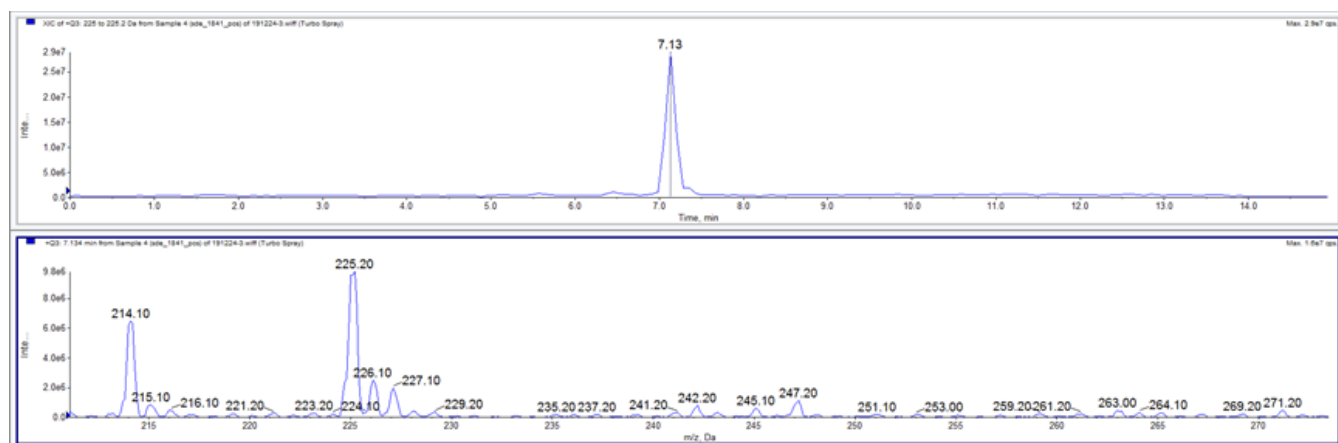

Figure S29. LC-MS/MS spectra of the compounds **14a** and **14b** mixture.

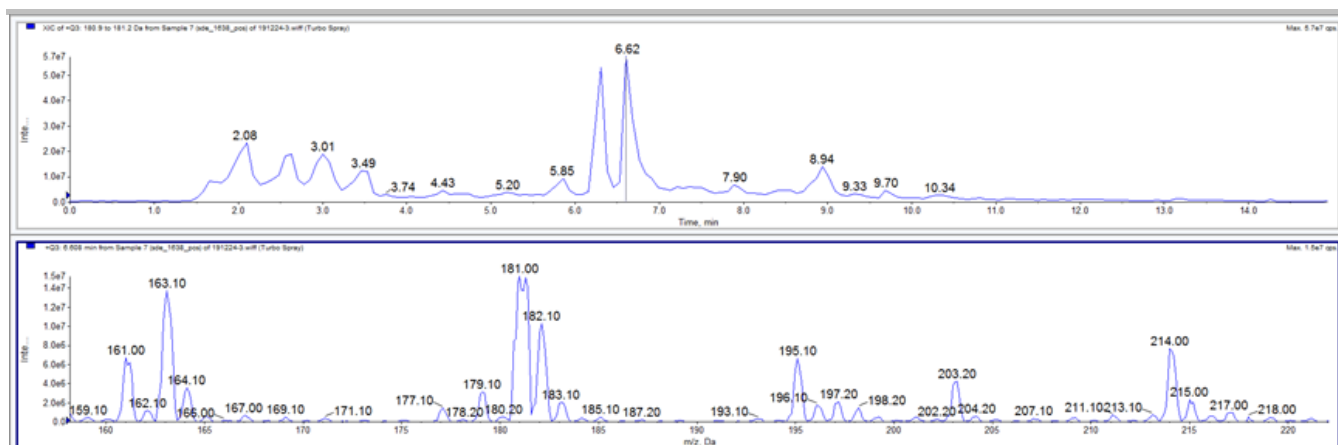

Figure S30. LC-MS/MS spectra of the compounds **16a** and **1b** mixture.

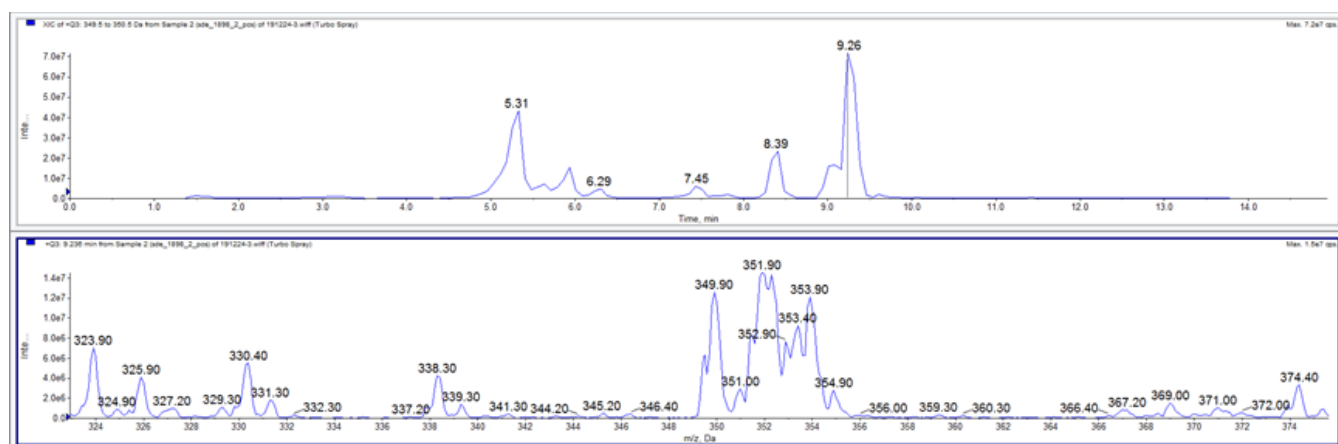

Figure S31. LC-MS/MS spectra of the the reaction mixture **4a** + **4b** + Br<sub>2</sub>.

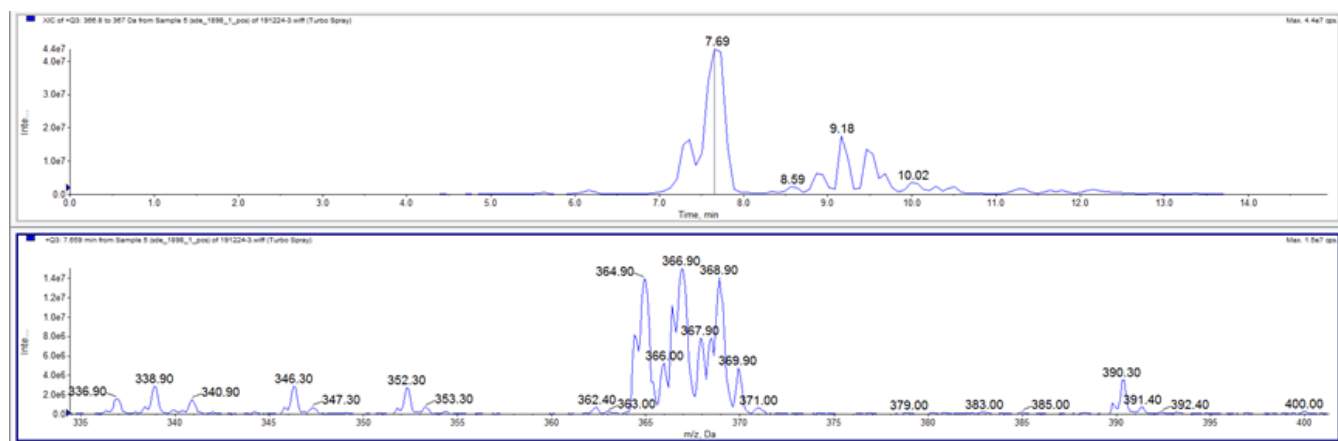

Figure S32. LC-MS/MS spectra of the the reaction mixture **5a** + **5b** + Br<sub>2</sub>.

---

## References

1. Yuan, X.; Yang, J.; Yang, X.; He, N.; Han, M.; Lin, J.; Yu, W.; Cheng, X.; Jin, Y. Methylene-Bridged Dimerization by Cu-Catalyzed Deconstructive C-C Cleavage of Oxacycloalkane. *Org. Lett.* **2023**, *25*, 5630–5635, doi:10.1021/acs.orglett.3c02015.
2. Mellor, J.M.; Webb, C.F. Stereochemistry of the Diels-Alder Reaction: Steric Effects of the Dienophile on Endo-Selectivity. *J. Chem. Soc. Perkin Trans. 2* **1974**, 17–22, doi:10.1039/p29740000017.
3. Yamauchi, M.; Watanabe, T. High Asymmetric Induction in the Diels-Alder Reactions of 1-Benzoyl-1-Phenyl- Menthylloxycarbonylethene. *J. Chem. Soc. Chem. Commun.* **1988**, 27–28.
4. Snider, B.B.; Smith, R.B. Mn(III)-Based Oxidative Free-Radical Cyclizations of Alkenyl Meldrum's Acids. *Tetrahedron* **2002**, *58*, 25–34, doi:10.1016/S0040-4020(01)01054-7.
5. Zia-Ebrahimi, M.; Huffman, G.W. Synthesis and Utility of a Novel Methylene Meldrum's Acid Precursor. *Synthesis (Stuttg.)* **1996**, 215–218, doi:10.1055/s-1996-4201.
6. Burke, D.J.; Kawauchi, T.; Kade, M.J.; Leibfarth, F.A.; McDearmon, B.; Wolffs, M.; Kierstead, P.H.; Moon, B.; Hawker, C.J. Ketene-Based Route to Rigid Cyclobutanediol Monomers for the Replacement of BPA in High Performance Polyesters. *ACS Macro Lett.* **2012**, *1*, 1228–1232, doi:10.1021/mz300497m.
